# Supplementary material
Source: Springer Nature journal article supplement (https://www.springermedizin.de/resource/supplementary/12889_2014_6822_MOESM1_ESM.pdf/9499114)

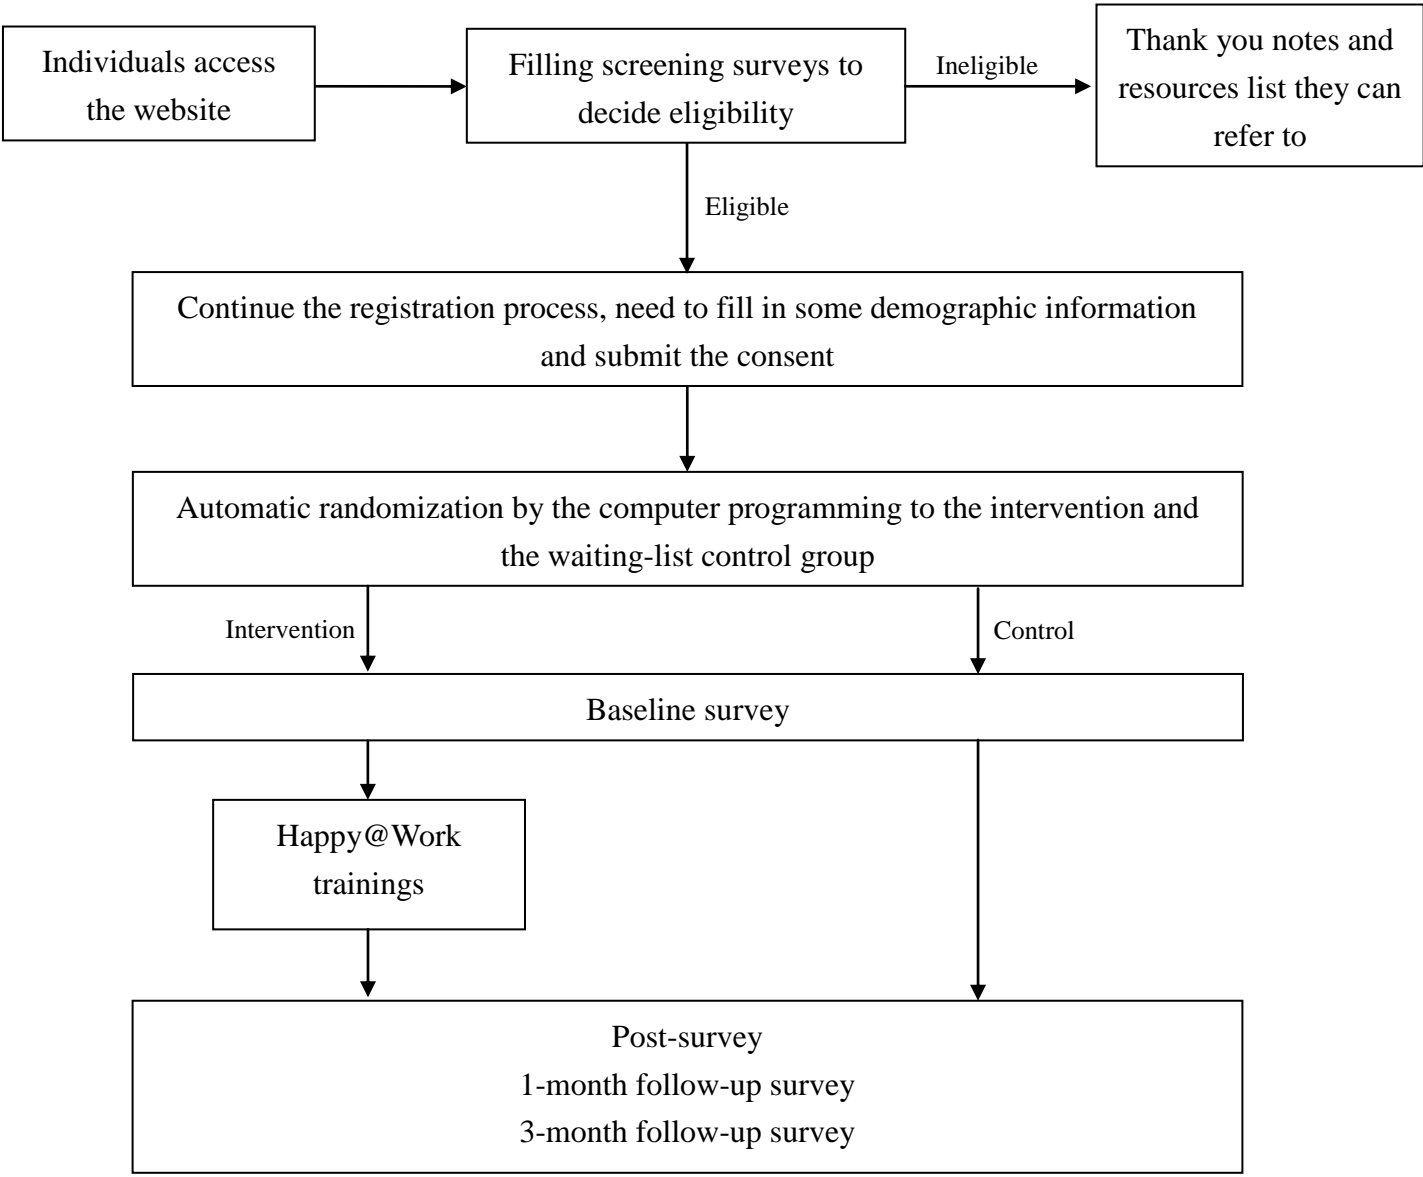

Supplement: MOESM1 [file 9499114]
